# Supplementary material
Source: MDPI journal article supplement (https://www.mdpi.com/2227-7390/9/2/166)
Supplement: s1 [file s1]

# Supplementary Material

## Part A: Graph Families

### 1. mod 4

Class 1:  $G_8[0, 1, 2]$ : Cube  $\text{fix}(G) = 3$

### 2. mod 5

Class 1:  $G_{10}[0, 1, 2]$ : Circulant Graph  $C_{10}(1, 5)$ ,  $\text{fix}(G) = 2$

### 3. mod 6

Class 1:  $G_{12}[0, 1, 2]$ :  $P_2 \times C_6$ ,  $\text{fix}(G) = 2$

Class 2:  $G_{12}[0, 1, 3]$  : Half-step graph (Theorem 4.5),  $\text{fix}(G) = 3$

Class 3:  $G_{12}[0, 2, 4]$ :  $2K_{3,3}$ :  $\text{fix}(G) = 10$

### 4. mod 7

Class 1:  $G_{14}[0, 1, 2]$ : Circulant Graph  $C_{14}(1, 7)$ ,  $\text{fix}(G) = 2$

Class 2:  $G_{14}[0, 1, 3]$ :  $\text{fix}(G) \leq 3$

### 5. mod 8

Class 1:  $G_{16}[0, 1, 2]$ :  $P_2 \times C_8$ ,  $\text{fix}(G) = 2$

Class 2:  $G_{16}[0, 1, 3]$ :  $\text{fix}(G) \leq 3$

Class 3:  $G_{16}[0, 1, 4]$  : Half-step graph, (Theorem 4.5)  $\text{fix}(G) = 4$

Class 4:  $G_{16}[0, 2, 4]$ :  $2(P_2 \times C_4)$ ,  $\text{fix}(G) = 4$

### 6. mod 9

Class 1:  $ML_{18}$ ,  $\text{fix}(G) = 2$ ,  $G_{18}[0, 1, 2]$ ,  $G_{18}[0, 2, 4]$ , and  $G_{18}[0, 1, 5]$ .

Class 2:  $G_{18}[0, 1, 3]$ ,  $\text{fix}(G) = 1$ ,  $G_{18}[0, 1, 3]$ ,  $G_{18}[0, 1, 7]$ ,  $G_{18}[0, 1, 4]$ ,  $G_{18}[0, 1, 6]$ ,  $G_{18}[0, 2, 5]$ , and  $G_{18}[0, 2, 6]$ .

Class 3:  $3K_{3,3}$ ,  $\text{fix}(G) = 12$ ,  $G_{18}[0, 3, 6]$

### 7. mod 10

Class 1:  $P_2 \times C_{10}$ ,  $\text{fix}(G) = 2$ :  $G_{20}[0, 1, 2]$ , and  $G_{20}[0, 3, 6]$

Class 2:  $2ML_{10}$ ,  $\text{fix}(G) = 4$ :  $G_{20}[0, 2, 4]$ , and  $G_{20}[0, 4, 8]$

Class 3:  $\text{fix}(G) = 1$  (any vertex can be fixed):  $G_{20}[0, 1, 3]$ ,  $G_{20}[0, 1, 4]$ ,  $G_{20}[0, 1, 7]$ , and  $G_{20}[0, 1, 8]$

Class 4: Half-step (Theorem 4.5),  $\text{fix}(G) = 5$ :  $G_{20}[0, 1, 5]$ ,  $G_{20}[0, 1, 6]$ ,  $G_{20}[0, 2, 5]$ , and  $G_{20}[0, 2, 7]$

### 8. mod 11

Class 1:  $ML_{22}$ ,  $\text{fix}(G) = 2$ :  $G_{22}[0, 1, 2]$ ,  $G_{22}[0, 2, 4]$ ,  $G_{22}[0, 3, 6]$ ,  $G_{22}[0, 4, 8]$ , and  $G_{22}[0, 5, 10]$ .

Class 2:  $\text{fix}(G) = 1$  (any vertex can be fixed):  $G_{22}[0, 1, 3]$ ,  $G_{22}[0, 1, 4]$ ,  $G_{22}[0, 1, 5]$ ,  $G_{22}[0, 1, 7]$ ,  $G_{22}[0, 1, 8]$ ,  $G_{22}[0, 1, 9]$ ,  $G_{22}[0, 2, 5]$ ,  $G_{22}[0, 2, 6]$ ,  $G_{22}[0, 2, 7]$ , and  $G_{22}[0, 2, 8]$ .

### 9. mod 12

Class 1:  $P_2 \times C_{12}$ ,  $\text{fix}(G) = 2$ :  $G_{24}[0, 1, 2]$ ,  $G_{24}[0, 5, 10]$

Class 2:  $\text{fix}(G) = 1$  (any vertex can be fixed):  $G_{24}[0, 1, 3]$ ,  $G_{24}[0, 1, 10]$ ,  $G_{24}[0, 2, 5]$ , and  $G_{24}[0, 2, 9]$ .

Class 3:  $\text{fix}(G) = 1$  (any vertex can be fixed):  $G_{24}[0, 1, 4]$ ,  $G_{24}[0, 1, 9]$ ,  $G_{24}[0, 3, 7]$ , and  $G_{24}[0, 3, 8]$ .

- Class 4:  $\text{fix}(G) = 2$ :  $G_{24}[0, 1, 5]$ ,  $G_{24}[0, 1, 8]$
- Class 5: Half-step graph,  $\text{fix}(G) = 6$ ,  $G_{24}[0, 1, 6]$ ,  $G_{24}[0, 1, 7]$
- Class 6:  $G_{24}[0, 2, 4]$ :  $2(P_2 \times C_6)$ ,  $\text{fix}(G) = 4$
- Class 7:  $G_{24}[0, 2, 6]$ ,  $G_{24}[0, 2, 8]$ : Two half-step graphs,  $\text{fix}(G) = 6$
- Class 8:  $G_{24}[0, 3, 6]$ :  $3(P_2 \times C_4)$ ,  $\text{fix}(G) = 6$
- Class 9:  $G_{24}[0, 4, 8]$ :  $4K_{3,3}$ ,  $\text{fix}(G) = 16$
10. mod 13
- Class 1:  $ML_{26}$ ,  $\text{fix}(G) = 2$ :  $G_{26}[0, 1, 2]$ ,  $G_{26}[0, 2, 4]$ ,  $G_{26}[0, 3, 6]$ ,  $G_{26}[0, 4, 8]$ ,  $G_{26}[0, 5, 10]$ , and  $G_{26}[0, 6, 12]$
- Class 2:  $\text{fix}(G) = 1$  (any vertex can be fixed):  $G_{26}[0, 1, 3]$ ,  $G_{26}[0, 1, 5]$ ,  $G_{26}[0, 1, 6]$ ,  $G_{26}[0, 1, 8]$ ,  $G_{26}[0, 1, 9]$ ,  $G_{26}[0, 1, 11]$ ,  $G_{26}[0, 2, 5]$ ,  $G_{26}[0, 2, 6]$ ,  $G_{26}[0, 2, 9]$ ,  $G_{26}[0, 2, 10]$ ,  $G_{26}[0, 3, 7]$ , and  $G_{26}[0, 3, 9]$
- Class 3:  $\text{fix}(G) = 1$  (any vertex can be fixed):  $G_{26}[0, 1, 4]$ ,  $G_{26}[0, 1, 10]$ ,  $G_{26}[0, 2, 7]$ , and  $G_{26}[0, 2, 8]$ .
11. mod 14
- Class 1:  $P_2 \times C_{14}$ ,  $\text{fix}(G) = 2$ :  $G_{28}[0, 1, 2]$ ,  $G_{28}[0, 3, 6]$ , and  $G_{28}[0, 5, 10]$
- Class 2:  $2ML_{14}$ ,  $\text{fix}(G) = 4$ :  $G_{28}[0, 2, 4]$ ,  $G_{28}[0, 4, 8]$ , and  $G_{28}[0, 6, 12]$
- Class 3:  $\text{fix}(G) = 1$ , any vertex:  $G_{28}[0, 1, 3]$ ,  $G_{28}[0, 1, 12]$ ,  $G_{28}[0, 1, 5]$ ,  $G_{28}[0, 1, 10]$ ,  $G_{28}[0, 3, 8]$ , and  $G_{28}[0, 3, 9]$ .
- Class 4:  $\text{fix}(G) = 1$ , any vertex:  $G_{28}[0, 1, 4]$ ,  $G_{28}[0, 1, 11]$ ,  $G_{28}[0, 1, 6]$ ,  $G_{28}[0, 1, 9]$ ,  $G_{28}[0, 2, 5]$ , and  $G_{28}[0, 2, 11]$ .
- Class 5: half-step,  $\text{fix}(G) = 7$ ,  $G_{28}[0, 1, 7]$ ,  $G_{28}[0, 1, 8]$ ,  $G_{28}[0, 2, 7]$ ,  $G_{28}[0, 2, 9]$ ,  $G_{28}[0, 3, 7]$ , and  $G_{28}[0, 3, 10]$ .
- Class 6. Two disjoint graphs,  $\text{fix}(G) = 6$ :  $G_{28}[0, 2, 6]$ , and  $G_{28}[0, 2, 10]$ .
12. mod 15
- Class 1:  $ML_{15}$ ,  $\text{fix}(G) = 2$ :  $G_{30}[0, 1, 2]$ ,  $G_{30}[0, 2, 4]$ ,  $G_{30}[0, 4, 8]$ , and  $G_{30}[0, 7, 14]$ .
- Class 2:  $3ML_5$ ,  $\text{fix}(G) = 6$ :  $G_{30}[0, 3, 6]$ , and  $G_{30}[0, 6, 12]$ .
- Class 3:  $5ML_3$ ,  $\text{fix}(G) = 10$ :  $G_{30}[0, 5, 10]$ .
- Class 4:  $\text{fix}(G) = 1$ : any vertex:  $G_{30}[0, 1, 3]$ ,  $G_{30}[0, 1, 13]$ ,  $G_{30}[0, 1, 7]$ ,  $G_{30}[0, 1, 9]$ ,  $G_{30}[0, 2, 6]$ ,  $G_{30}[0, 2, 11]$ ,  $G_{30}[0, 3, 7]$ , and  $G_{30}[0, 3, 11]$ .
- Class 5:  $\text{fix}(G) = 2$ :  $G_{30}[0, 1, 4]$ ,  $G_{30}[0, 1, 12]$ ,  $G_{30}[0, 2, 8]$ , and  $G_{30}[0, 2, 9]$ .
- Class 6:  $\text{fix}(G) = 2$ :  $G_{30}[0, 1, 5]$ ,  $G_{30}[0, 1, 11]$ ,  $G_{30}[0, 2, 7]$ , and  $G_{30}[0, 2, 10]$ .
- Class 7:  $\text{fix}(G) = 1$ : any vertex:  $G_{30}[0, 1, 6]$ ,  $G_{30}[0, 1, 10]$ ,  $G_{30}[0, 2, 5]$ ,  $G_{30}[0, 2, 12]$ ,  $G_{30}[0, 3, 8]$ ,  $G_{30}[0, 3, 10]$ ,  $G_{30}[0, 4, 9]$ , and  $G_{30}[0, 4, 10]$ .
13. mod 16
- Class 1:  $P_2 \times C_{16}$ :  $\text{fix}(G) = 2$ :  $G_{32}[0, 1, 2]$ ,  $G_{32}[0, 3, 6]$ ,  $G_{32}[0, 5, 10]$ , and  $G_{32}[0, 7, 14]$ .
- Class 2:  $2(P_2 \times C_8)$ ,  $\text{fix}(G) = 4$ :  $G_{32}[0, 2, 4]$ , and  $G_{32}[0, 6, 12]$ .
- Class 3:  $4(P_2 \times C_4)$ :  $G_{32}[0, 4, 8]$ .
- Class 4:  $\text{fix}(G) = 1$ : any vertex:  $G_{32}[0, 1, 3]$ ,  $G_{32}[0, 1, 14]$ ,  $G_{32}[0, 1, 6]$ ,  $G_{32}[0, 1, 11]$ ,  $G_{32}[0, 2, 7]$ ,  $G_{32}[0, 2, 11]$ ,  $G_{32}[0, 3, 9]$ , and  $G_{32}[0, 3, 10]$ .

Class 5:  $\text{fix}(G) = 1$ : any vertex:  $G_{32}[0, 1, 4]$ ,  $G_{32}[0, 1, 13]$ ,  $G_{32}[0, 1, 5]$ ,  $G_{32}[0, 1, 12]$ ,  $G_{32}[0, 3, 7]$ ,  $G_{32}[0, 3, 12]$ ,  $G_{32}[0, 4, 9]$ , and  $G_{32}[0, 4, 11]$ .

Class 6:  $\text{fix}(G) = 2$ :  $G_{32}[0, 1, 7]$ ,  $G_{32}[0, 1, 10]$ ,  $G_{32}[0, 2, 5]$ , and  $G_{32}[0, 2, 13]$ .

Class 7: half-step:  $\text{fix}(G) = 8$ :  $G_{32}[0, 1, 8]$ ,  $G_{32}[0, 1, 9]$ ,  $G_{32}[0, 3, 8]$ , and  $G_{32}[0, 3, 11]$ .

Class 8:  $\text{fix}(G) = 4$ :  $G_{32}[0, 2, 6]$ , and  $G_{32}[0, 2, 12]$ .

Class 9:  $\text{fix}(G) = 4$ :  $G_{32}[0, 2, 8]$ , and  $G_{32}[0, 2, 10]$ .

We note the cases become increasingly complex for cases when  $n$  is highly composite.

## Part B: Remaining cases from Theorem 4.2

1. 1 fixed block - second possibility  $[k-1, 0, 2] \rightarrow [k-1, 0, 2]$ ,  $[0, 1, 3] \rightarrow [k-3, k-2, 0]$ ,  $[k-3, k-2, 0] \rightarrow [0, 1, 3]$

This implies that  $k-1 \rightarrow \{k-1, 2\}$ ,  $2 \rightarrow \{k-1, 2\}$ ,  $1 \rightarrow \{k-3, k-2\}$ ,  $3 \rightarrow \{k-3, k-2\}$ ,  $k-3 \rightarrow \{1, 3\}$  and  $k-2 \rightarrow \{1, 3\}$ .

We then consider the block  $[2, 3, 5]$ . It has to be mapped to a block with a  $k-1$  or 2 and either a  $k-3$  or  $k-2$ . We consider the four following cases:

- $2 \rightarrow k-1$ ,  $3 \rightarrow k-3$

Then the block  $[2, 3, 5]$  would be mapped to a block with a  $k-1$  and a  $k-3$ . This would be the block  $[k-4, k-3, k-1]$ , implying that  $5 \rightarrow k-4$ , and also that  $k-1 \rightarrow 2$  and  $1 \rightarrow k-2$ . Then the block  $[1, 2, 4]$  has to be mapped to a block with a  $k-2$  and a  $k-1$ . This would be the block  $[k-2, k-1, 1]$ , implying that  $4 \rightarrow 1$ . This is a contradiction because only  $k-3$  or  $k-2$  can be mapped to 1.

- $2 \rightarrow k-1$ ,  $3 \rightarrow k-2$

In this case,  $[2, 3, 5]$  is going to be mapped to a block with a  $k-1$  and a  $k-2$ . This is the block  $[k-2, k-3, 1]$ , further implying that  $5 \rightarrow 1$ . This is a contradiction because only  $k-3$  or  $k-2$  can be mapped to 1.

- $2 \rightarrow 2$ ,  $3 \rightarrow k-2$

In this case, the block  $[2, 3, 5]$  must be mapped to a block with a 2 and a  $k-2$ . Such block does not exist.

- $2 \rightarrow 2$ ,  $3 \rightarrow k-3$

In this case,  $[2, 3, 5]$  must be mapped to a block with a 2 and a  $k-3$ . Such block does not exist.

1. 1 Fixed block - third possibility

$[k-3, k-2, 0] \rightarrow [k-3, k-2, 0]$ ,  $[0, 1, 3] \rightarrow [k-1, 0, 2]$ ,  $[k-1, 0, 2] \rightarrow [0, 1, 3]$

This implies that  $k-3 \rightarrow \{k-3, k-2\}$ ,  $k-2 \rightarrow \{k-3, k-2\}$ ,  $1 \rightarrow \{k-1, 2\}$ ,  $3 \rightarrow \{k-1, 2\}$ ,  $k-1 \rightarrow \{1, 3\}$  and  $2 \rightarrow \{1, 3\}$

We first consider the block  $[2, 3, 5]$ . It must be mapped to a block with a 1 or 3 and either a  $k-1$  or

2. We consider the four following cases:

- $2 \rightarrow 1$ ,  $3 \rightarrow 2$

In this case,  $[2, 3, 5]$  would have to be mapped to a block with a 1 and a 2, which would be the block  $[1, 2, 4]$ , implying  $5 \rightarrow 4$ ,  $k-1 \rightarrow 3$  and  $1 \rightarrow k-1$ . Then the block  $[1, 2, 4]$  would be mapped to a block with a  $k-1$  and a 1, which would be the block  $[k-2, k-1, 1]$ , implying that  $4 \rightarrow k-2$ . This is a contradiction because only  $k-3$  or  $k-2$  can be mapped to  $k-2$ .

- $2 \rightarrow 1, 3 \rightarrow k - 1$

In this case,  $[2, 3, 5]$  would have to be mapped to a block with a 1 and a  $k - 1$ . This would be the block  $[k - 2, k - 1, 1]$ , implying that  $5 \rightarrow k - 2$ . This is a contradiction because only  $k - 3$  or  $k - 2$  can be mapped to  $k - 2$ .

- $2 \rightarrow 3, 3 \rightarrow 2$

In this case,  $[2, 3, 5]$  has to be mapped to a block with a 3 and a 2. This would mean  $[2, 3, 5] \rightarrow [2, 3, 5]$ , implying  $5 \rightarrow 5$ ,  $k - 1 \rightarrow 1$  and  $1 \rightarrow k - 1$ . In this case, the block  $[1, 2, 4]$  would have to be mapped to a block with a 3 and a  $k - 1$ . Such block does not exist.

- $2 \rightarrow 3, 3 \rightarrow k - 1$

In this case, the block  $[2, 3, 5]$  would have to be mapped to a block with a 3 and a  $k - 1$ . Such block does not exist.
